# Supplementary material for: Human Induced Pluripotent Stem Cell-Derived 3D-Neurospheres Are Suitable for Neurotoxicity Screening
Source: MDPI journal article supplement (doi:10.3390/cells9051122), 2020-05-01
Supplement: s1 [file s1]

## Supplementary Tables

**Table S1. Antibodies used for immunocytochemistry and flow cytometry**

|                             | Antibody                               | Antibody Registry* Identifier | Dilution | Company (Cat #; LOT #)              |
|-----------------------------|----------------------------------------|-------------------------------|----------|-------------------------------------|
| <b>Neuronal markers</b>     | Mouse anti-NESTIN                      | AB_2251134                    | 1:1000   | Merck (MAB5326; 2919678)            |
|                             | Rabbit anti-PAX6                       | AB_291612                     | 1:250    | Covance (PRB278P; B201255)          |
|                             | Rabbit anti-MAP2                       | AB_94856                      | 1:1000   | Merck (MAB3418; 2654330)            |
|                             | Mouse anti-TUBB3                       | AB_1119489                    | 1:1000   | Santa Cruz (sc58888; B1815)         |
|                             | Rabbit anti-NF200-KD                   | AB_306298                     | 1:1000   | Abcam (ab8135; GR3183142-8)         |
|                             | Rabbit anti-VAMP2                      | AB_2798240                    | 1:250    | Cell Signalling (13508; 01/2018)    |
|                             | Rabbit anti-Vglut1/2                   | AB_2285905                    | 1:500    | Synaptic Systems (135503; 135503/8) |
|                             | Rabbit anti-GAD65/67                   | AB_880149                     | 1:1000   | Abcam (ab49832; GR135533-2)         |
|                             | Rabbit anti-VACHT                      | AB_887864                     | 1:500    | Synaptic Systems (139103; 2-46)     |
|                             | Rabbit anti-TH                         | AB_297840                     | 1:500    | Abcam (ab112; 920883)               |
|                             | Rabbit anti-AQP4                       | AB_2274338                    | 1:100    | Santa Cruz (sc20812; E3014)         |
|                             | Rabbit anti-GFAP                       | AB_305808                     | 1:500    | Abcam (ab7260; GR3202608-2)         |
|                             | Mouse anti-MBP                         | AB_325006                     | 1:20     | AbD Serotec (MCA686S; 260505)       |
| <b>Others</b>               | Rabbit anti-Ki-67                      | AB_302459                     | 1:200    | Abcam (ab16667; GR216200-2)         |
| <b>Secondary Antibodies</b> | Alexa Fluor 488 donkey anti-mouse IgG  | AB_141633                     | 1:600    | Thermo Fisher (A21202; 1890861)     |
|                             | Alexa Fluor 488 goat anti-rabbit IgG   | AB_143165                     | 1:600    | Thermo Fisher (A11008; 1869581)     |
|                             | Alexa Fluor 594 donkey anti-mouse IgG  | AB_2535789                    | 1:2000   | Thermo Fisher (A21203; 1820027)     |
|                             | Alexa Fluor 594 donkey anti-rabbit IgG | AB_141637                     | 1:3000   | Thermo Fisher (A21207; 1890862)     |
|                             |                                        |                               |          |                                     |

\* <http://antibodyregistry.org/>

**Table S2. Primers used in the study**

| Gene Symbol                                    | Gene ID                                  | Primer Sequence (5'-3') |                          | PCR product (bp) |
|------------------------------------------------|------------------------------------------|-------------------------|--------------------------|------------------|
| RT-qPCR primers                                |                                          |                         |                          |                  |
| <i>PAX6</i>                                    | 5080                                     | F:                      | GCCAGCAACACACCTAGTCA     | 138              |
|                                                |                                          | R:                      | TGTGAGGGCTGTGTCTGTTC     |                  |
| <i>NES</i>                                     | 10763                                    | F:                      | ACTGAAGTCTGCGGGACAAG     | 64               |
|                                                |                                          | R:                      | CAGTGGTGCTTGAGTTTCTG     |                  |
| <i>SOX1</i>                                    | 6656                                     | F:                      | TAGTAAGGCAGGTCCAAGCA     | 98               |
|                                                |                                          | R:                      | GGGTGGTGGTGGTAATCTCT     |                  |
| <i>SOX9</i>                                    | 6662                                     | F:                      | GTGCTCAAAGGCTACGACTG     | 80               |
|                                                |                                          | R:                      | TTGACGTGCGGCTTGTTT       |                  |
| <i>TUBB3</i>                                   | 10381                                    | F:                      | AACGAGGCCTCTTCTCACAA     | 107              |
|                                                |                                          | R:                      | GGCCTGAAGAGATGTCCAAA     |                  |
| <i>MAP2</i>                                    | 4133                                     | F:                      | TTGTCTCTAACCGAGGAAGCA    | 103              |
|                                                |                                          | R:                      | TCGTTGTGTCGTGTTCTCAA     |                  |
| <i>MKI67</i>                                   | 4288                                     | F:                      | ACGGATTATACCTGGCCTTC     | 180              |
|                                                |                                          | R:                      | AGGAAGCTGGATACGGATGT     |                  |
| <i>MAPT</i>                                    | 4137                                     | F:                      | TTGGAAGTCTGCCATGATT      | 82               |
|                                                |                                          | R:                      | GGCACAAGTCCTTACAAAGAGAAC |                  |
| <i>DLG4</i>                                    | 1742                                     | F:                      | ACAAGCGGATCACAGAGGAG     | 187              |
|                                                |                                          | R:                      | AGTCTCTCTCGGGCTGGAAC     |                  |
| <i>RBFOX3</i>                                  | 146713                                   | F:                      | GGAGAAGCTGAATGGGACGA     | 60               |
|                                                |                                          | R:                      | GCCGTGGCATTATTGACCT      |                  |
| <i>AQP4</i>                                    | 361                                      | F:                      | ATGGAGGTGGAGGACAACAG     | 85               |
|                                                |                                          | R:                      | GGTCAACGTCAATCACATGC     |                  |
| <i>CLDN11</i>                                  | 5010                                     | F:                      | TTCCTGAAATCCTCAATTCATC   | 133              |
|                                                |                                          | R:                      | ACATCATACAAACCTGAAATCAAA |                  |
| <i>GRIN1</i>                                   | 2902                                     | F:                      | GCAACACCAACATCTGGAAG     | 68               |
|                                                |                                          | R:                      | ATCCGCATACTTGAAGACA      |                  |
| <i>CHAT</i>                                    | 1103                                     | F:                      | GCCTGCTGCAATCAGTTCTT     | 114              |
|                                                |                                          | R:                      | GTCCTCGTTGGAAGCCATT      |                  |
| <i>TH</i>                                      | 7054                                     | F:                      | TCCACGCTGTACTGGTTCAC     | 71               |
|                                                |                                          | R:                      | GCACCATAGGCCTTCACCTC     |                  |
| <i>GAD1</i>                                    | 2571                                     | F:                      | GCACAGGTCATCCTCGATTT     | 81               |
|                                                |                                          | R:                      | TTGATGTCAGCCATTCTCCA     |                  |
| <i>SLC6A4</i>                                  | 6532                                     | F:                      | GTGAGGATGTGGATGGAGGT     | 191              |
|                                                |                                          | R:                      | GCGAGATAGCATCCCTGTTC     |                  |
| <i>GAPDH</i> <sup>1</sup>                      | 2597                                     | F:                      | CTCTCTGCTCCTCCTGTTTCGAC  | 69               |
|                                                |                                          | R:                      | TGAGCGATGTGGCTCGGCT      |                  |
| RT-qPCR and RT-PCR primers used for XBP1-assay |                                          |                         |                          |                  |
| <i>XBP1</i> (S) <sup>2</sup>                   | 7494<br>(NM_001079539.1)                 | F:                      | TGCTGAGTCCGCAGCAGGTG     | 169              |
|                                                |                                          | R:                      | GCTGGCAGGCTCTGGGGAAG     |                  |
| <i>XBP1</i> (S) /<br><i>XBP1</i> (U)           | 7494<br>(NM_001079539.1;<br>NM_005080.3) | F:                      | GGGAATGAAGTGAGGCCAGT     | 183/209          |
|                                                |                                          | R:                      | GGAAGGGCATTGGAAGAACA     |                  |

<sup>1</sup> The reference gene used in this study. <sup>2</sup> van Schadewijk et al. 2012; F, Forward; R, Reverse

**Table S3. Tested compounds and their concentration**

| Compound name<br>[chemical name]                                                                  | CAS<br>number | Supplier<br>(Cat.N.)  | Purity        | Stock<br>conc.<br>(mM) | Stock<br>solvent | Tested conc.<br>( $\mu$ M)              |
|---------------------------------------------------------------------------------------------------|---------------|-----------------------|---------------|------------------------|------------------|-----------------------------------------|
| Paraquat dichloride hydrate [1,1'-Dimethyl-4,4'-bipyridinium dichloride hydrate]                  | 75365-73-0    | Carbosynth (FP40644)  | $\geq 98\%$   | 100                    | water            | 1000, 600, 300, 100, 30, 10, 1          |
| Doxorubicin hydrochloride                                                                         | 25316-40-9    | Sigma-Aldrich (D1515) | $\geq 98.0\%$ | 200                    | water            | 200, 100, 30, 10, 1, 0.1, 0.01          |
| Paracetamol [4'-Hydroxy-acetanilide]                                                              | 103-90-2      | Sigma-Aldrich (A7085) | $\geq 99\%$   | 100                    | DMSO             | 100, 50, 30, 10, 1, 0.1, 0.01           |
| Rotenone                                                                                          | 83-79-4       | TCI Chemicals (R0090) | 96.5 %        | 100                    | DMSO             | 100, 30, 10, 1, 0.1, 0.01, 0.001        |
| Ibuprofen [ $\alpha$ -Methyl-4-(isobutyl)phenylacetic acid]                                       | 15687-27-1    | TCI Chemicals (I0415) | 99.9%         | 100                    | DMSO             | 100, 30, 10, 1, 0.1, 0.3, 0.01          |
| Valproic acid [2-Propyl-pentanoic acid]                                                           | 1069-66-5     | Sigma-Aldrich (P4543) | $\geq 98\%$   | 400                    | water            | 400, 200, 100, 50, 30, 10, 1            |
| Acrylamide [2-Propen-amide]                                                                       | 79-06-1       | Sigma-Aldrich (A3553) | $\geq 99\%$   | 3500                   | water            | 3500, 2000, 1000, 600, 300, 100, 10     |
| Rifampicin [3-(4-Methyl-piperazinylimino-methyl)rifamycin]                                        | 13292-46-1    | Carbosynth (AR11351)  | $\geq 96.5\%$ | 100                    | DMSO             | 100, 30, 10, 1, 0.1, 0.03, 0.01         |
| Mercury(II) chloride                                                                              | 7487-94-7     | Carbosynth (FM35310)  | $\geq 99.5\%$ | 1000                   | DMSO             | 1000, 600, 100, 30, 10, 1, 0.1          |
| Hexachlorophene [2,2'-Methylenebis(3,4,6-trichlorophenol)]                                        | 70-30-4       | TCI Chemicals (M0219) | 99.5%         | 100                    | DMSO             | 100, 10, 1, 0.3, 0.1, 0.03, 0.01        |
| Colchicine [(S)-N-(5,6,7,9-Tetrahydro-1,2,3,10-tetramethoxy-9-oxobenzo[a]heptalen-7-yl)acetamide] | 64-86-8       | Carbosynth (FC11732)  | $\geq 94\%$   | 50                     | water            | 10, 1, 0.1, 0.01, 0.001, 0.0003, 0.0001 |

**Table S4. Effective concentration (EC) values of compounds tested on D21, D28 and D42 3D neurospheres**

| Compounds                                 | D21<br>(log $\mu$ M) |                     |                     | D28<br>(log $\mu$ M) |                     |                     | D42<br>(log $\mu$ M) |                     |                     |
|-------------------------------------------|----------------------|---------------------|---------------------|----------------------|---------------------|---------------------|----------------------|---------------------|---------------------|
|                                           | EC50                 | EC25                | EC10                | EC50                 | EC25                | EC10                | EC50                 | EC25                | EC10                |
|                                           | $\pm$ SD             | $\pm$ SD            | $\pm$ SD            | $\pm$ SD             | $\pm$ SD            | $\pm$ SD            | $\pm$ SD             | $\pm$ SD            | $\pm$ SD            |
| Colchicine (COL)                          | -0.49<br>$\pm$ 0.17  | -2.04<br>$\pm$ 0.21 | -3.59<br>$\pm$ 0.37 | -0.64<br>$\pm$ 0.11  | -1.89<br>$\pm$ 0.15 | -3.16<br>$\pm$ 0.24 | -0.92<br>$\pm$ 0.14  | -2.24<br>$\pm$ 0.18 | -3.55<br>$\pm$ 0.29 |
| Rotenone (ROT)                            | -0.61<br>$\pm$ 0.08  | -1.25<br>$\pm$ 0.10 | -1.89<br>$\pm$ 0.16 | -0.74<br>$\pm$ 0.08  | -1.46<br>$\pm$ 0.12 | -2.19<br>$\pm$ 0.18 | -0.62<br>$\pm$ 0.13  | -1.48<br>$\pm$ 0.18 | -2.35<br>$\pm$ 0.27 |
| Doxorubicin (DOX)                         | 0.67<br>$\pm$ 0.07   | 0.04<br>$\pm$ 0.10  | -0.58<br>$\pm$ 0.15 | 1.11<br>$\pm$ 0.06   | 0.72<br>$\pm$ 0.11  | 0.33<br>$\pm$ 0.17  | 1.32<br>$\pm$ 0.07   | 0.9<br>$\pm$ 0.11   | 0.49<br>$\pm$ 0.18  |
| Hexachlorophene (HE)                      | 1.26<br>$\pm$ 0.08   | 0.53<br>$\pm$ 0.10  | -0.2<br>$\pm$ 0.16  | 1.01<br>$\pm$ 0.05   | 0.21<br>$\pm$ 0.06  | -0.59<br>$\pm$ 0.09 | 0.5<br>$\pm$ 0.09    | -0.34<br>$\pm$ 0.10 | -1.18<br>$\pm$ 0.16 |
| Paraquat (PQ)                             | 1.89<br>$\pm$ 0.07   | 1.52<br>$\pm$ 0.10  | 1.15<br>$\pm$ 0.15  | 1.98<br>$\pm$ 0.05   | 1.67<br>$\pm$ 0.08  | 1.35<br>$\pm$ 0.12  | 1.79<br>$\pm$ 0.08   | 1.44<br>$\pm$ 0.11  | 1.09<br>$\pm$ 0.18  |
| Mercury(II) chloride (HgCl <sub>2</sub> ) | 1.87<br>$\pm$ 0.05   | 1.5<br>$\pm$ 0.06   | 1.1<br>$\pm$ 0.10   | 1.83<br>$\pm$ 0.03   | 1.60<br>$\pm$ 0.05  | 1.4<br>$\pm$ 0.07   | 1.74<br>$\pm$ 0.03   | 1.54<br>$\pm$ 0.04  | 1.34<br>$\pm$ 0.05  |
| Paracetamol (PAR)                         | >2                   | >2                  | >2                  | >2                   | >2                  | >2                  | >2                   | >2                  | >2                  |
| Ibuprofen (IBU)                           | >2                   | >2                  | >2                  | >2                   | >2                  | >2                  | >2                   | >2                  | >2                  |
| Rifampicin (RIF)                          | >2                   | >2                  | >2                  | >2                   | >2                  | >2                  | >2                   | >2                  | >2                  |
| Valproic acid (VPA)                       | >2.6                 | >2.6                | >2.6                | >2.6                 | >2.6                | >2.6                | >2.6                 | >2.6                | >2.6                |
| Acrylamide (ACR)                          | >3.5                 | >3.5                | >3.5                | >3.5                 | >3.5                | >3.5                | >3.5                 | >3.5                | >3.5                |
